# Supplementary material for: miR-1224-5p Mediates Mitochondrial Damage to Affect Silica-Induced Pulmonary Fibrosis by Targeting BECN1
Source: PubMed Central journal article supplement (PMC5713326; doi:10.3390/ijms18112357), 2017-11-07
Supplement: ijms-18-02357-s001.pdf [file ijms-18-02357-s001.pdf]

# Supplementary Materials: miR-1224-5p Mediates Mitochondrial Damage to Affect Silica-Induced Pulmonary Fibrosis by Targeting BECN1

Qiuyun Wu, Tiantian Xu, Yi Liu, Yan Li, Jiali Yuan, Wenxi Yao, Qi Xu, Weiwen Yan and Chunhui Ni

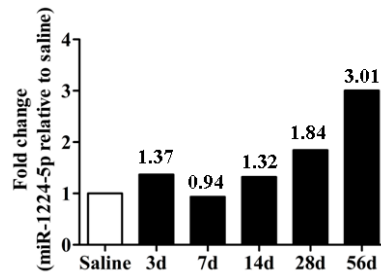

**Figure S1.** The fold changes of miR-1224-5p in C57BL/6 mouse lung tissues that harvested on days 3, 7, 14, 28 and 56 after the silica administration were determined by microRNA (miRNA, miR) microarray with total RNAs analysis.

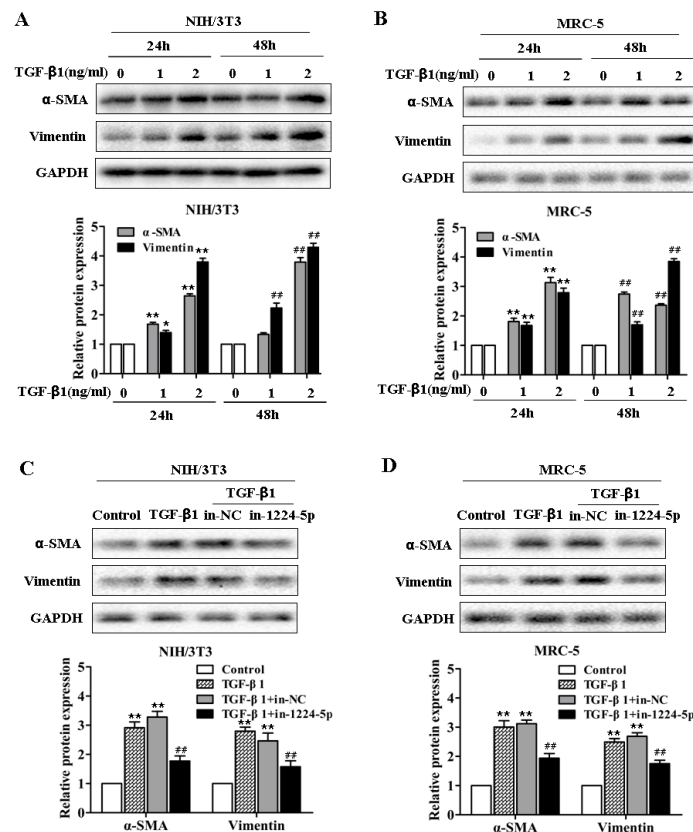

**Figure S2.** (A,B) Western blot and densitometric analysis of  $\alpha$ -SMA and Vimentin expression in fibroblasts (NIH/3T3 and MRC-5) treated with different dose of TGF- $\beta$ 1 for 24 and 48 h, with \*  $p < 0.05$  and \*\*  $p < 0.01$  vs. the 24 h control group, with ##  $P < 0.01$  vs. the 48 h control group; (C,D) Western blot and densitometric analysis of  $\alpha$ -SMA and Vimentin expression in fibroblasts (NIH/3T3 and MRC-5) transfected with miR-1224-5p inhibitor (in-1224-5p) or its negative control (in-NC) then treated with 2 ng/mL TGF- $\beta$ 1 for 48 h, with \*\*  $p < 0.01$  vs. the control group and ##  $p < 0.01$  vs. the TGF- $\beta$ 1 plus in-NC group. All data are expressed as the mean  $\pm$  SD of at least three independent experiments.

## Supplemental Experimental Procedure

### Western Blot

The cells and lung tissues were lysed in cold lysis buffer (M-PER reagent for cells and T-PER reagent for tissues, Thermo Scientific) for 30 min. The supernatant were collected by centrifugation at 12,000 rpm for 15 min at 4 °C. The protein concentration was measured using a BCA protein assay kit (Beyotime Bio, Shanghai, China). A total of 80 µg protein samples were subjected to the SDS-PAGE on 10% polyacrylamide gradient gels at 60 V (constant voltage) for 3 h. The PVDF membranes (0.22 µm pore size, Millipore, Bedford, MA, USA) were incubated in methanol for about 1 min at room temperature, then the gels were transferred to PVDF membranes in transfer buffer at 200 mA (constant current) for 90 min. The membranes were blocked in 5% nonfat milk in Tris buffered saline containing 0.1% Tween 20 (TBST; 50 mM Tris-HCl (pH = 7.6), 150 mM NaCl, 0.1% Tween 20) at room temperature for at least 1 h. The primary antibodies were diluted at recommended proportion in 5% nonfat milk. The membranes were incubation with primary antibodies at 4 °C overnight, and then washed in TBST buffer for 15 min. After incubation with the appropriate secondary antibody (Beyotime Bio, Shanghai, China) diluted in 5% nonfat milk for 1 h at room temperature, the membrane were washed three times in TBST buffer (15 min for per time). The membrane analysis was performed via a ChemiDoc XRS+ imaging system (Bio-Rad Laboratories, Inc., Hercules, CA, USA). GAPDH was used as a loading control. Western blot bands were quantified using the Image J software.

### Supplemental Experimental Data

**Table S1.** The densitometric analysis of Western blot in Figure 1C.

|   |            | Saline   | 7d       | 14d      | 28d      |
|---|------------|----------|----------|----------|----------|
| 1 | E-cadherin | 8708.9   | 6796.1   | 3586.8   | 2685.3   |
|   | α-SMA      | 3067.4   | 5075.9   | 6097.1   | 8830.5   |
|   | Vimentin   | 4206.3   | 5004.2   | 5282.7   | 6209.6   |
|   | GAPDH      | 4853.5   | 4921.7   | 4201.1   | 4294.4   |
|   | Collagen I | 2706.5   | 5760.8   | 9570.9   | 11,476.4 |
|   | GAPDH      | 11,388.8 | 15,969.7 | 12,874.9 | 13,175.2 |
| 2 | E-cadherin | 9031.8   | 8190.4   | 4367.7   | 1732.5   |
|   | α-SMA      | 2394.4   | 3890.0   | 6935.3   | 7884.1   |
|   | Vimentin   | 2597.6   | 3941.0   | 5160.8   | 5195.2   |
|   | GAPDH      | 9769.9   | 9731.3   | 10,753.7 | 8224.0   |
|   | Collagen I | 3071.6   | 6209.1   | 10,563.8 | 14,627.2 |
|   | GAPDH      | 12,641.1 | 16,112.7 | 15,578.9 | 14,196.4 |
| 3 | E-cadherin | 4221.1   | 3186.4   | 3294.3   | 1871.1   |
|   | α-SMA      | 2868.9   | 4675.1   | 9735.5   | 9678.2   |
|   | Vimentin   | 3034.8   | 3017.1   | 5724.6   | 6051.7   |
|   | GAPDH      | 9135.1   | 7831.3   | 10,733.2 | 9241.8   |
|   | Collagen I | 6944.7   | 8378.9   | 25,321.5 | 27,676.8 |
|   | GAPDH      | 12,745.9 | 12,148.9 | 13,553.8 | 14,043.4 |

**Table S2.** The densitometric analysis of Western blot in Figure 1E.

|   |       | Saline   | 7d       | 14d      | 28d      |
|---|-------|----------|----------|----------|----------|
| 1 | PINK1 | 4714.1   | 7845.1   | 2578.8   | 1743.0   |
|   | PARK2 | 9764.8   | 22,934.9 | 7196.7   | 3843.8   |
|   | p62   | 3293.7   | 4096.5   | 4531.0   | 6995.9   |
|   | GAPDH | 5151.6   | 5308.4   | 4989.8   | 5237.6   |
| 2 | PINK1 | 10,927.5 | 24,347.7 | 9042.8   | 8951.8   |
|   | PARK2 | 21,459.4 | 45,267.0 | 21,650.6 | 14,551.7 |
|   | p62   | 14,515.2 | 27,649.3 | 27,879.4 | 35,547.6 |
|   | GAPDH | 26,242.0 | 28,973.6 | 25,998.4 | 27,115.6 |
| 3 | PINK1 | 19,514.3 | 32,719.4 | 12,852.4 | 10,971.7 |
|   | PARK2 | 18,249.8 | 30,282.3 | 11,949.7 | 6209.6   |
|   | p62   | 24,016.4 | 26,403.6 | 29,885.5 | 42,439.5 |
|   | GAPDH | 31,238.3 | 27,498.5 | 26,546.8 | 29,021.7 |

**Table S3.** The densitometric analysis of Western blot in Figure 2D.

|   |               | Saline   | Silica   | Silica+anta-NC | Silica+anta-1224-5p |
|---|---------------|----------|----------|----------------|---------------------|
| 1 | E-cadherin    | 5775.4   | 2682.5   | 3003.5         | 5467.6              |
|   | $\alpha$ -SMA | 3943.3   | 9109.2   | 9262.8         | 3794.7              |
|   | Vimentin      | 1958.2   | 4398.0   | 4763.7         | 2729.4              |
|   | GAPDH         | 6468.8   | 6587.0   | 6085.5         | 5793.8              |
|   | Collagen I    | 4213.0   | 14,672.3 | 17,715.5       | 5547.8              |
|   | GAPDH         | 7894.6   | 8829.6   | 9040.0         | 8984.8              |
| 2 | E-cadherin    | 24,472.2 | 6864.4   | 6338.3         | 22,024.6            |
|   | $\alpha$ -SMA | 3806.9   | 6359.7   | 7536.8         | 5195.1              |
|   | Vimentin      | 4556.9   | 8714.0   | 10,244.8       | 5390.6              |
|   | GAPDH         | 13,940.2 | 11,704.6 | 13,864.8       | 12,053.8            |
|   | Collagen I    | 7367.3   | 22,760.8 | 21,033.4       | 7566.5              |
|   | GAPDH         | 11,770.9 | 10,019.9 | 10,591.7       | 9197.8              |
| 3 | E-cadherin    | 18,328.1 | 11,077.8 | 10,026.2       | 23,577.7            |
|   | $\alpha$ -SMA | 3968.7   | 8652.8   | 10,006.3       | 6656.1              |
|   | Vimentin      | 4552.6   | 8346.8   | 9378.2         | 4517.7              |
|   | GAPDH         | 5186.1   | 4986.0   | 5325.1         | 5236.8              |
|   | Collagen I    | 3485.1   | 11,359.6 | 11,032.1       | 6109.9              |
|   | GAPDH         | 11,705.2 | 12,198.9 | 12,779.7       | 13,690.0            |

**Table S4.** The densitometric analysis of Western blot in Figure 2E.

|   |       | Saline   | Silica   | Silica+anta-NC | Silica+anta-1224-5p |
|---|-------|----------|----------|----------------|---------------------|
| 1 | PINK1 | 7963.1   | 3466.9   | 2800.6         | 9661.1              |
|   | PARK2 | 6887.9   | 3093.9   | 4506.9         | 8087.7              |
|   | p62   | 2326.6   | 5021.4   | 5849.0         | 2241.5              |
|   | GAPDH | 6018.2   | 5372.9   | 5834.0         | 5598.3              |
| 2 | PINK1 | 32181.3  | 16,664.1 | 22,189.8       | 36,381.8            |
|   | PARK2 | 5681.8   | 2766.9   | 1719.9         | 6016.7              |
|   | p62   | 2742.3   | 6096.8   | 6380.6         | 4089.7              |
|   | GAPDH | 21,147.5 | 21,017.8 | 21,378.7       | 22,447.6            |
| 3 | PINK1 | 17,678.0 | 5188.8   | 7453.4         | 24,227.0            |
|   | PARK2 | 22,287.5 | 6532.0   | 7093.4         | 18,284.3            |
|   | p62   | 4656.3   | 10,323.3 | 9082.9         | 6727.3              |
|   | GAPDH | 18,864.4 | 21,359.7 | 17,679.0       | 19,070.9            |

**Table S5.** The densitometric analysis of Western blot in Figure 3D.

|         |       | <b>Control</b> | <b>TGF-<math>\beta</math>1</b> | <b>TGF-<math>\beta</math>1+in-NC</b> | <b>TGF-<math>\beta</math>1+in-1224-5p</b> |
|---------|-------|----------------|--------------------------------|--------------------------------------|-------------------------------------------|
| NIH/3T3 |       |                |                                |                                      |                                           |
| 1       | PINK1 | 18,160.0       | 5380.5                         | 5474.5                               | 19,462.8                                  |
|         | PARK2 | 18,586.1       | 7721.9                         | 8110.1                               | 15,028.9                                  |
|         | p62   | 12,382.3       | 22,124.5                       | 17,202.0                             | 7242.2                                    |
|         | GAPDH | 15,490.6       | 13,169.2                       | 12,805.0                             | 12,641.1                                  |
| 2       | PINK1 | 32,276.8       | 13,388.5                       | 12,531.1                             | 35,019.4                                  |
|         | PARK2 | 28,512.2       | 9878.3                         | 12,267.6                             | 26,665.9                                  |
|         | p62   | 2119.1         | 6149.7                         | 4782.2                               | 2471.4                                    |
|         | GAPDH | 5345.4         | 6316.2                         | 6695.1                               | 5879.6                                    |
| 3       | PINK1 | 29,411.9       | 15,742.8                       | 13,915.9                             | 32,097.6                                  |
|         | PARK2 | 13,542.3       | 6543.9                         | 7721.8                               | 13,543.7                                  |
|         | p62   | 4220.9         | 9672.4                         | 9043.7                               | 4819.4                                    |
|         | GAPDH | 5035.6         | 5217.3                         | 5109.3                               | 5173.8                                    |
| MRC-5   |       |                |                                |                                      |                                           |
| 1       | PINK1 | 23,132.3       | 8110.2                         | 10,646.8                             | 24,863.4                                  |
|         | PARK2 | 23,139.6       | 7302.1                         | 9097.4                               | 29,314.6                                  |
|         | p62   | 7053.2         | 14,046.5                       | 17,112.1                             | 8290.4                                    |
|         | GAPDH | 10,394.3       | 10,885.7                       | 11,422.4                             | 12,865.2                                  |
| 2       | PINK1 | 24,933.1       | 13,567.0                       | 11,250.1                             | 30,221.8                                  |
|         | PARK2 | 24,354.9       | 11,284.6                       | 13,843.9                             | 21,834.4                                  |
|         | p62   | 7836.3         | 13,243.8                       | 17,225.8                             | 9150.1                                    |
|         | GAPDH | 6125.5         | 6358.7                         | 6130.0                               | 6122.4                                    |
| 3       | PINK1 | 29,949.2       | 10,940.8                       | 15,712.5                             | 28,074.3                                  |
|         | PARK2 | 29,110.1       | 13,432.5                       | 14,323.7                             | 31,345.4                                  |
|         | p62   | 2094.1         | 4637.4                         | 5292.5                               | 2097.5                                    |
|         | GAPDH | 27,942.3       | 28,699.0                       | 27,825.1                             | 26,070.4                                  |

**Table S6.** The densitometric analysis of Western blot in Figure 4C.

|   |       | <b>Saline</b> | <b>7d</b> | <b>14d</b> | <b>28d</b> |
|---|-------|---------------|-----------|------------|------------|
| 1 | BECN1 | 21,783.8      | 20,597.6  | 11,838.5   | 6491.1     |
|   | GAPDH | 23,264.0      | 23,373.5  | 21,075.0   | 23,199.7   |
| 2 | BECN1 | 18,140.4      | 17,477.5  | 10,144.7   | 6674.4     |
|   | GAPDH | 9066.6        | 8941.8    | 8160.3     | 8253.1     |
| 3 | BECN1 | 13,733.0      | 16,412.1  | 6207.3     | 3296.8     |
|   | GAPDH | 7629.6        | 7851.7    | 8781.1     | 9864.7     |

**Table S7.** The densitometric analysis of Western blot in Figure 4D.

|   |       | <b>Saline</b> | <b>Silica</b> | <b>Silica+anta-NC</b> | <b>Silica+anta-1224-5p</b> |
|---|-------|---------------|---------------|-----------------------|----------------------------|
| 1 | BECN1 | 15,118.1      | 4579.1        | 6590.5                | 14,641.4                   |
|   | GAPDH | 17,226.9      | 17,261.9      | 18,664.8              | 16,946.8                   |
| 2 | BECN1 | 28,293.9      | 12,727.7      | 10,141.6              | 28,600.7                   |
|   | GAPDH | 11,745.6      | 12,612.5      | 14,371.3              | 13,247.0                   |
| 3 | BECN1 | 8634.2        | 2554.0        | 2782.9                | 6605.4                     |
|   | GAPDH | 12,204.8      | 12,785.4      | 11,211.6              | 9113.6                     |

**Table S8.** The densitometric analysis of Western blot in Figure 4E.

|         |       | <b>Control</b> | <b>TGF-<math>\beta</math>1</b> | <b>TGF-<math>\beta</math>1+in-NC</b> | <b>TGF-<math>\beta</math>1+in-1224-5p</b> |
|---------|-------|----------------|--------------------------------|--------------------------------------|-------------------------------------------|
| NIH/3T3 |       |                |                                |                                      |                                           |
| 1       | BECN1 | 24,010.3       | 10,169.2                       | 6469.1                               | 23,651.5                                  |
|         | GAPDH | 10,495.2       | 12,573.3                       | 10,703.5                             | 11,003.8                                  |
| 2       | BECN1 | 25,321.5       | 11,628.2                       | 9753.1                               | 31,767.5                                  |
|         | GAPDH | 27,270.2       | 26,049.7                       | 30,032.4                             | 28,500.9                                  |
| 3       | BECN1 | 17,583.7       | 6784.4                         | 8143.2                               | 18,643.1                                  |
|         | GAPDH | 33,642.2       | 29,792.9                       | 33,479.0                             | 34,928.1                                  |
| MRC-5   |       |                |                                |                                      |                                           |
| 1       | BECN1 | 29,208.8       | 14,300.1                       | 13,210.5                             | 33,407.3                                  |
|         | GAPDH | 12,759.5       | 14,053.9                       | 13,628.9                             | 15,971.9                                  |
| 2       | BECN1 | 19,754.5       | 9587.3                         | 8742.2                               | 16,322.8                                  |
|         | GAPDH | 18,515.9       | 14,174.3                       | 18,823.2                             | 17,404.3                                  |
| 3       | BECN1 | 28,754.9       | 15,326.4                       | 15,356.6                             | 33,743.5                                  |
|         | GAPDH | 34,590.0       | 34,757.6                       | 31,094.1                             | 36,717.5                                  |

**Table S9.** The densitometric analysis of Western blot in Figure 5B and 5C.

|         |        | <b>Control</b> | <b>TGF-<math>\beta</math>1</b> | <b>TGF-<math>\beta</math>1+in-1224-5p</b> | <b>TGF-<math>\beta</math>1+in-1224-5p+siBECN1</b> |
|---------|--------|----------------|--------------------------------|-------------------------------------------|---------------------------------------------------|
| NIH/3T3 |        |                |                                |                                           |                                                   |
| 1       | PARK2  | 24,898.4       | 12,778.7                       | 29,041.6                                  | 9231.0                                            |
|         | TOMM20 | 20,053.8       | 17,884.3                       | 19,273.7                                  | 18,954.6                                          |
| 2       | PARK2  | 34,045.7       | 18,784.7                       | 31,145.9                                  | 15,114.2                                          |
|         | TOMM20 | 5272.7         | 7197.8                         | 5225.4                                    | 6084.7                                            |
| 3       | PARK2  | 12,998.8       | 5982.8                         | 11,980.9                                  | 7005.0                                            |
|         | TOMM20 | 20,503.8       | 20,971.6                       | 17,035.1                                  | 18,039.4                                          |
| MRC-5   |        |                |                                |                                           |                                                   |
| 1       | PARK2  | 14,397.2       | 5910.8                         | 14,584.0                                  | 8813.4                                            |
|         | TOMM20 | 20,308.7       | 19,803.2                       | 18,764.1                                  | 21,492.0                                          |
| 2       | PARK2  | 12,332.9       | 4476.6                         | 13,191.3                                  | 4598.0                                            |
|         | TOMM20 | 23,389.4       | 21,734.3                       | 25,597.2                                  | 22,057.2                                          |
| 3       | PARK2  | 9345.9         | 7313.6                         | 11,179.2                                  | 6004.1                                            |
|         | TOMM20 | 6836.2         | 8596.3                         | 7422.5                                    | 7097.0                                            |

**Table S10.** The densitometric analysis of Western blot in Figure 6A and 6B.

|         |       | <b>Control</b> | <b>TGF-<math>\beta</math>1</b> | <b>TGF-<math>\beta</math>1+si-NC</b> | <b>TGF-<math>\beta</math>1+siPARK2</b> |
|---------|-------|----------------|--------------------------------|--------------------------------------|----------------------------------------|
| NIH/3T3 |       |                |                                |                                      |                                        |
| 1       | PARK2 | 37,324.7       | 21,724.1                       | 20,777.7                             | 10,257.7                               |
|         | P62   | 10,553.5       | 15,944.8                       | 21,302.7                             | 27,384.6                               |
|         | GAPDH | 20,478.7       | 21,499.7                       | 20,610.3                             | 19,081.0                               |
| 2       | PARK2 | 8195.2         | 5856.6                         | 3928.4                               | 2762.6                                 |
|         | P62   | 16,463.0       | 27,611.2                       | 32,518.8                             | 37,111.1                               |
|         | GAPDH | 3938.4         | 3643.5                         | 4194.3                               | 4185.4                                 |
| 3       | PARK2 | 18,952.9       | 11,697.5                       | 12,875.4                             | 4479.4                                 |
|         | P62   | 6712.9         | 8245.6                         | 10,984.3                             | 15,769.1                               |
|         | GAPDH | 13,304.3       | 13,045.3                       | 14,557.4                             | 15,737.5                               |
| MRC-5   |       |                |                                |                                      |                                        |
| 1       | PARK2 | 25,772.5       | 15,823.4                       | 13,847.7                             | 6538.8                                 |
|         | P62   | 10,439.0       | 15,538.0                       | 17,063.7                             | 24,003.2                               |
|         | GAPDH | 24,958.1       | 25,367.0                       | 22,838.5                             | 25,840.4                               |
| 2       | PARK2 | 21,703.5       | 10,043.1                       | 10,369.7                             | 6703.3                                 |
|         | P62   | 4575.1         | 9183.1                         | 10,148.4                             | 10,697.3                               |
|         | GAPDH | 11,710.7       | 12,318.2                       | 13,287.9                             | 11,853.3                               |
| 3       | PARK2 | 20,272.1       | 14,763.7                       | 9441.6                               | 2927.4                                 |
|         | P62   | 4204.5         | 9309.2                         | 8301.4                               | 10,537.3                               |
|         | GAPDH | 17,673.6       | 19,507.1                       | 20,539.6                             | 16,003.8                               |

**Table S11.** The densitometric analysis of Western blot in Figure 7A.

|   |                   | <b>Control</b> | <b>TGF-<math>\beta</math>1</b> | <b>TGF-<math>\beta</math>1+si-NC</b> | <b>TGF-<math>\beta</math>1+siPARK2</b> |
|---|-------------------|----------------|--------------------------------|--------------------------------------|----------------------------------------|
| 1 | PDGFR- $\alpha$   | 12,274.6       | 12,777.1                       | 12,639.3                             | 13,893.3                               |
|   | p-PDGFR- $\alpha$ | 1199.4         | 2863.8                         | 3251.0                               | 5014.7                                 |
|   | PDGFR- $\beta$    | 9809.6         | 11,200.4                       | 8589.5                               | 8888.9                                 |
|   | p-PDGFR- $\beta$  | 2046.0         | 6012.2                         | 5742.8                               | 6524.8                                 |
|   | PI3K p85          | 30,669.4       | 30,511.7                       | 26,734.0                             | 28,461.6                               |
|   | p-PI3K p85        | 7407.6         | 13,040.0                       | 10,678.8                             | 17,682.6                               |
|   | Akt               | 16,666.7       | 17,618.5                       | 19,298.0                             | 20,179.1                               |
|   | p-Akt             | 3458.5         | 6290.3                         | 6463.2                               | 8275.4                                 |
|   | $\alpha$ -SMA     | 1978.6         | 4257.4                         | 4423.3                               | 5370.6                                 |
|   | GAPDH             | 13,728.8       | 16,691.6                       | 15,378.1                             | 14,793.4                               |
| 2 | PDGFR- $\alpha$   | 7140.2         | 7586.2                         | 8024.1                               | 7903.4                                 |
|   | p-PDGFR- $\alpha$ | 3646.4         | 6736.5                         | 7983.9                               | 12,798.0                               |
|   | PDGFR- $\beta$    | 14,144.9       | 15,207.8                       | 18,852.3                             | 14,756.5                               |
|   | p-PDGFR- $\beta$  | 2173.3         | 7273.1                         | 8169.4                               | 9096.4                                 |
|   | PI3K p85          | 13,324.5       | 11,089.4                       | 13,543.6                             | 14,573.8                               |
|   | p-PI3K p85        | 13,742.0       | 20,527.6                       | 28,387.5                             | 38,409.6                               |
|   | Akt               | 8964.4         | 8653.3                         | 7647.5                               | 9467.3                                 |
|   | p-Akt             | 3479.5         | 5466.4                         | 6176.8                               | 9005.4                                 |
|   | $\alpha$ -SMA     | 1583.8         | 3042.7                         | 3145.8                               | 4423.3                                 |
|   | GAPDH             | 23,654.5       | 25,654.3                       | 25,687.4                             | 26,587.4                               |
| 3 | PDGFR- $\alpha$   | 10,596.2       | 10,587.3                       | 9447.9                               | 9019.3                                 |
|   | p-PDGFR- $\alpha$ | 3195.0         | 7657.7                         | 7357.1                               | 9884.8                                 |
|   | PDGFR- $\beta$    | 14,531.6       | 17,338.4                       | 16,541.0                             | 14,222.1                               |
|   | p-PDGFR- $\beta$  | 2931.1         | 8363.5                         | 9276.5                               | 10,656.2                               |
|   | PI3K p85          | 9565.4         | 10,034.6                       | 11,436.4                             | 10,865.4                               |
|   | p-PI3K p85        | 7589.1         | 17,368.2                       | 16,643.9                             | 27,559.1                               |
|   | Akt               | 13,945.4       | 16,534.5                       | 14,576.5                             | 15,438.6                               |
|   | p-Akt             | 5467.9         | 9754.4                         | 8954.6                               | 12,335.7                               |
|   | $\alpha$ -SMA     | 2431.2         | 4096.9                         | 4761.3                               | 6703.2                                 |
|   | GAPDH             | 8945.5         | 7834.6                         | 9655.5                               | 8756.4                                 |

**Table S12.** The densitometric analysis of Western blot in Figure 7B.

|   |                   | <b>Control</b> | <b>TGF-<math>\beta</math>1</b> | <b>TGF-<math>\beta</math>1+si-NC</b> | <b>TGF-<math>\beta</math>1+siPARK2</b> |
|---|-------------------|----------------|--------------------------------|--------------------------------------|----------------------------------------|
| 1 | PDGFR- $\alpha$   | 13,892.3       | 12,031.1                       | 12,917.3                             | 14,173.8                               |
|   | p-PDGFR- $\alpha$ | 6312.9         | 9103.9                         | 10,517.5                             | 15,847.7                               |
|   | PDGFR- $\beta$    | 15,801.0       | 14,317.5                       | 12,509.9                             | 11,364.5                               |
|   | p-PDGFR- $\beta$  | 8897.9         | 11,906.8                       | 14,872.4                             | 20,181.3                               |
|   | PI3K p85          | 18,527.3       | 14,891.1                       | 16,007.2                             | 15,009.7                               |
|   | p-PI3K p85        | 3315.0         | 5854.2                         | 6176.1                               | 7578.1                                 |
|   | Akt               | 35,059.2       | 34,298.3                       | 32,824.5                             | 35,681.3                               |
|   | p-Akt             | 6506.1         | 11,553.7                       | 10,388.4                             | 16,780.6                               |
|   | $\alpha$ -SMA     | 6275.9         | 8940.8                         | 12,063.7                             | 17,361.9                               |
|   | GAPDH             | 15,975.2       | 15,689.1                       | 17,470.3                             | 18,840.9                               |
| 2 | PDGFR- $\alpha$   | 6433.1         | 6397.8                         | 5794.6                               | 6538.5                                 |
|   | p-PDGFR- $\alpha$ | 1899.6         | 3807.2                         | 3158.6                               | 6064.5                                 |
|   | PDGFR- $\beta$    | 10,590.5       | 8473.4                         | 7835.6                               | 9633.5                                 |
|   | p-PDGFR- $\beta$  | 2988.2         | 5017.2                         | 3584.0                               | 8455.6                                 |
|   | PI3K p85          | 12,564.9       | 10,345.4                       | 11,356.7                             | 13,343.7                               |
|   | p-PI3K p85        | 8745.7         | 12,456.9                       | 12,433.5                             | 21,654.7                               |
|   | Akt               | 15,432.5       | 14,564.3                       | 16,755.7                             | 18,569.4                               |
|   | p-Akt             | 5753.5         | 8954.6                         | 9356.2                               | 15,436.2                               |
|   | $\alpha$ -SMA     | 3889.8         | 6191.9                         | 7070.0                               | 9247.6                                 |
|   | GAPDH             | 13,324.5       | 11,235.6                       | 15,345.3                             | 16,476.4                               |
| 3 | PDGFR- $\alpha$   | 4922.5         | 4561.6                         | 4654.5                               | 4327.2                                 |
|   | p-PDGFR- $\alpha$ | 2359.5         | 4064.8                         | 3365.1                               | 5628.8                                 |
|   | PDGFR- $\beta$    | 17,060.7       | 19,033.3                       | 19,259.6                             | 18,135.4                               |
|   | p-PDGFR- $\beta$  | 8959.3         | 19,365.4                       | 20,090.9                             | 23,421.6                               |
|   | PI3K p85          | 12,435.6       | 16,554.6                       | 14,658.1                             | 17,543.4                               |
|   | p-PI3K p85        | 3456.5         | 7753.7                         | 7537.3                               | 11,054.7                               |
|   | Akt               | 7843.6         | 8934.5                         | 7436.3                               | 8543.6                                 |
|   | p-Akt             | 2456.5         | 6533.4                         | 5468.6                               | 7865.4                                 |
|   | $\alpha$ -SMA     | 3606.1         | 8176.0                         | 7811.4                               | 12,383.1                               |
|   | GAPDH             | 12,543.5       | 15,765.4                       | 14,650.3                             | 16,765.3                               |



**Table S13.** The densitometric analysis of Western blot in Figure 7C.

|   |                   | <b>Control</b> | <b>TGF-<math>\beta</math>1</b> | <b>TGF-<math>\beta</math>1+siPARK2+DMSO</b> | <b>TGF-<math>\beta</math>1+siPARK2+AG1296</b> |
|---|-------------------|----------------|--------------------------------|---------------------------------------------|-----------------------------------------------|
| 1 | PDGFR- $\alpha$   | 22,202.0       | 21,203.8                       | 19,951.3                                    | 18,145.7                                      |
|   | p-PDGFR- $\alpha$ | 2812.4         | 5676.0                         | 3914.6                                      | 1881.0                                        |
|   | PDGFR- $\beta$    | 21,041.9       | 16,457.7                       | 17,659.7                                    | 18,456.8                                      |
|   | p-PDGFR- $\beta$  | 6437.4         | 11,589.3                       | 14,008.1                                    | 11,534.2                                      |
|   | PI3K p85          | 20,632.5       | 22,891.6                       | 24,257.7                                    | 23,801.1                                      |
|   | p-PI3K p85        | 2044.0         | 4132.4                         | 4139.3                                      | 1901.1                                        |
|   | Akt               | 32,117.4       | 33,984.8                       | 33,641.6                                    | 30,023.9                                      |
|   | p-Akt             | 3497.0         | 6991.3                         | 6010.7                                      | 4660.2                                        |
|   | $\alpha$ -SMA     | 1961.2         | 3785.2                         | 3233.7                                      | 3196.4                                        |
|   | GAPDH             | 25,161.0       | 24,002.0                       | 22,282.7                                    | 29,236.6                                      |
| 2 | PDGFR- $\alpha$   | 5933.6         | 6649.6                         | 6657.8                                      | 7615.8                                        |
|   | p-PDGFR- $\alpha$ | 3547.8         | 7656.0                         | 7980.4                                      | 5195.0                                        |
|   | PDGFR- $\beta$    | 24,976.5       | 28,465.4                       | 29,454.3                                    | 26,547.9                                      |
|   | p-PDGFR- $\beta$  | 5394.3         | 12,994.4                       | 12,665.3                                    | 9217.5                                        |
|   | PI3K p85          | 10,546.7       | 12,465.4                       | 13,676.4                                    | 12,436.7                                      |
|   | p-PI3K p85        | 7264.1         | 13,113.4                       | 16,995.8                                    | 10,499.1                                      |
|   | Akt               | 8389.5         | 9076.4                         | 8954.3                                      | 8734.6                                        |
|   | p-Akt             | 14,490.9       | 23,312.1                       | 26,098.0                                    | 15,685.2                                      |
|   | $\alpha$ -SMA     | 3035.4         | 7047.2                         | 7274.6                                      | 4744.7                                        |
|   | GAPDH             | 15,670.4       | 17,443.8                       | 16,576.6                                    | 17,576.4                                      |
| 3 | PDGFR- $\alpha$   | 9271.1         | 12,596.7                       | 10,244.8                                    | 10,559.6                                      |
|   | p-PDGFR- $\alpha$ | 5547.2         | 11,151.4                       | 9575.3                                      | 5023.6                                        |
|   | PDGFR- $\beta$    | 15,578.4       | 15,540.6                       | 13,259.6                                    | 14,674.9                                      |
|   | p-PDGFR- $\beta$  | 3893.9         | 6821.6                         | 8123.5                                      | 5242.6                                        |
|   | PI3K p85          | 13,546.6       | 17,965.6                       | 16,537.4                                    | 14,576.5                                      |
|   | p-PI3K p85        | 7304.7         | 17,130.5                       | 18,319.2                                    | 10,925.8                                      |
|   | Akt               | 8954.6         | 8657.1                         | 7057.3                                      | 9542.6                                        |
|   | p-Akt             | 11,779.8       | 22,549.2                       | 21,064.3                                    | 16,831.9                                      |
|   | $\alpha$ -SMA     | 4861.0         | 7695.3                         | 9077.8                                      | 6568.8                                        |
|   | GAPDH             | 18,976.8       | 19,845.3                       | 20,546.7                                    | 21,456.4                                      |

**Table S14.** The densitometric analysis of Western blot in Figure 7D.

|   |                   | <b>Control</b> | <b>TGF-<math>\beta</math>1</b> | <b>TGF-<math>\beta</math>1+siPARK2+DMSO</b> | <b>TGF-<math>\beta</math>1+siPARK2+AG1296</b> |
|---|-------------------|----------------|--------------------------------|---------------------------------------------|-----------------------------------------------|
| 1 | PDGFR- $\alpha$   | 13,103.0       | 15,924.3                       | 16,587.1                                    | 11,356.7                                      |
|   | p-PDGFR- $\alpha$ | 5474.5         | 14,545.5                       | 16,626.9                                    | 5889.0                                        |
|   | PDGFR- $\beta$    | 18,555.0       | 17,593.2                       | 18,445.9                                    | 15,124.8                                      |
|   | p-PDGFR- $\beta$  | 10,894.7       | 17,112.4                       | 18,076.9                                    | 7514.1                                        |
|   | PI3K p85          | 21,736.3       | 20,948.3                       | 18,244.9                                    | 20,096.9                                      |
|   | p-PI3K p85        | 2846.3         | 6380.2                         | 6078.0                                      | 3822.8                                        |
|   | Akt               | 18,103.8       | 17,196.5                       | 16,241.1                                    | 20,767.4                                      |
|   | p-Akt             | 5314.2         | 8840.2                         | 8987.1                                      | 7819.7                                        |
|   | $\alpha$ -SMA     | 3732.1         | 8083.8                         | 6306.6                                      | 3896.4                                        |
|   | GAPDH             | 7689.5         | 8876.5                         | 8953.3                                      | 7843.7                                        |
| 2 | PDGFR- $\alpha$   | 11,012.8       | 12,787.4                       | 12,575.6                                    | 12,413.5                                      |
|   | p-PDGFR- $\alpha$ | 2538.3         | 6299.0                         | 5430.5                                      | 4835.3                                        |
|   | PDGFR- $\beta$    | 9658.4         | 8956.3                         | 8837.5                                      | 9845.7                                        |
|   | p-PDGFR- $\beta$  | 9434           | 19,303.4                       | 18,490.0                                    | 11,591.4                                      |
|   | PI3K p85          | 15,236.6       | 17,854.7                       | 15,654.7                                    | 16,653.6                                      |
|   | p-PI3K p85        | 8170.6         | 18,818.8                       | 17,277.4                                    | 8926.9                                        |
|   | Akt               | 11,895.0       | 13,254.3                       | 12,678.5                                    | 13,254.9                                      |
|   | p-Akt             | 16,230.1       | 36,347.1                       | 30,515.6                                    | 19,340.4                                      |
|   | $\alpha$ -SMA     | 4758.6         | 7355.9                         | 10,489.7                                    | 4931.4                                        |
|   | GAPDH             | 8945.4         | 7854.9                         | 9854.3                                      | 8754.6                                        |
| 3 | PDGFR- $\alpha$   | 15,295.8       | 13,796.6                       | 11,882.5                                    | 13,976.0                                      |
|   | p-PDGFR- $\alpha$ | 7265.2         | 12,054.0                       | 13,148.3                                    | 8333.9                                        |
|   | PDGFR- $\beta$    | 11,034.4       | 10,245.4                       | 12,675.4                                    | 12,498.6                                      |
|   | p-PDGFR- $\beta$  | 13,982.6       | 23,249.7                       | 27,146.9                                    | 15,607.6                                      |
|   | PI3K p85          | 6754.3         | 5424.9                         | 5489.6                                      | 6054.3                                        |
|   | p-PI3K p85        | 8424.0         | 13,623.0                       | 13,885.9                                    | 7976.8                                        |
|   | Akt               | 11,249.5       | 13,456.5                       | 10,546.7                                    | 12,465.6                                      |
|   | p-Akt             | 16,323.6       | 31,256.0                       | 25,381.5                                    | 15,232.2                                      |
|   | $\alpha$ -SMA     | 3011.0         | 7332.8                         | 6411.8                                      | 4039.8                                        |
|   | GAPDH             | 7854.3         | 8965.3                         | 9654.5                                      | 8324.5                                        |
